# Supplementary material for: Impacts of the 2015 Heat Waves on Mortality in the Czech Republic—A Comparison with Previous Heat Waves
Source: PubMed Central journal article supplement (PMC5750980; doi:10.3390/ijerph14121562), 2017-12-13
Supplement: ijerph-14-01562-s001.pdf [file ijerph-14-01562-s001.pdf]

**Impacts of the 2015 heat waves on mortality in the Czech Republic –  
A comparison with previous heat waves**

**Supplementary Material**

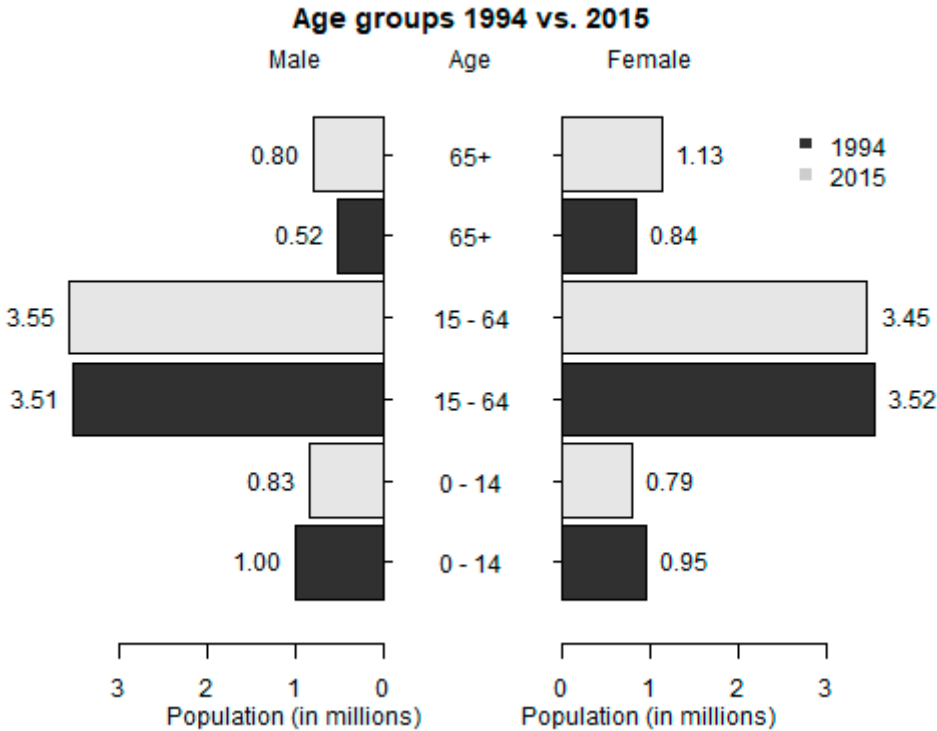

**Figure S1.** Population structure in the Czech Republic in 1994 and 2015. The data from the Czech Statistical Office are available online at: <https://www.czso.cz/staticke/animgraf/cz/>.

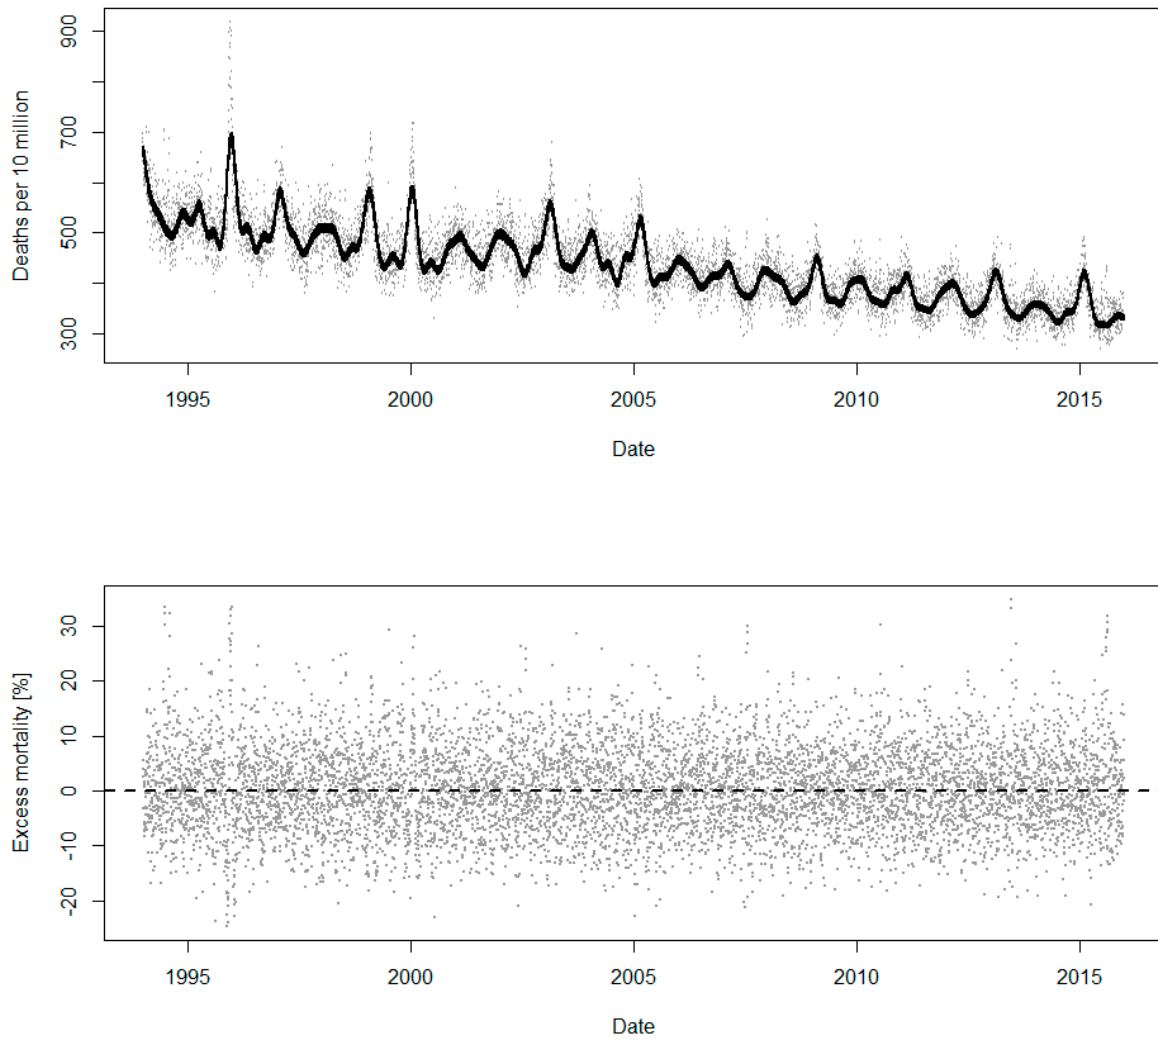

**Figure S2** *Top*: Daily numbers of natural-cause deaths per standardized 10 million inhabitants in the Czech Republic during 1994–2015. The black line denotes the mortality baseline adjusted for long-term trend, seasonality, weekly cycle, and the effect of heat waves. *Bottom*: Relative mortality deviations (excess mortality) from the baseline in the same population and period.

**Table S1.** Characteristics of heat waves during 1994–2015 in the Czech Republic.

| Heat wave | Start  | End    | Days | avgTmean (°C) | maxTmean (°C) | $\Sigma$ EHI <sub>sig</sub> (°C) | $\Sigma$ EHI <sub>accl</sub> (°C) | $\Sigma$ EHF (°C) |
|-----------|--------|--------|------|---------------|---------------|----------------------------------|-----------------------------------|-------------------|
| 1994_1    | 26-Jun | 29-Jun | 4    | 24.9          | 26.0          | 9.1                              | 34.9                              | 99.4              |
| _2        | 2-Jul  | 4-Jul  | 3    | 22.8          | 24.2          | 0.7                              | 14.2                              | 10.0              |
| _3        | 12-Jul | 17-Jul | 6    | 22.0          | 23.2          | 2.8                              | 15.4                              | 12.2              |
| _4        | 22-Jul | 8-Aug  | 18   | 24.1          | 26.9          | 51.5                             | 49.3                              | 176.6             |
| 1995_1    | 8-Jul  | 14-Jul | 7    | 22.8          | 24.1          | 8.9                              | 41.7                              | 70.1              |
| _2        | 20-Jul | 22-Jul | 3    | 23.4          | 24.5          | 1.7                              | 8.2                               | 11.3              |
| 1996_1    | 7-Jun  | 10-Jun | 4    | 22.9          | 23.3          | 3.0                              | 31.0                              | 35.9              |
| 1998_1    | 5-Jun  | 7-Jun  | 3    | 24.2          | 25.0          | 3.5                              | 23.2                              | 37.2              |
| _2        | 20-Jul | 23-Jul | 4    | 24.2          | 26.5          | 8.4                              | 26.5                              | 62.8              |
| 1999_1    | 3-Jul  | 6-Jul  | 4    | 23.3          | 25.1          | 4.1                              | 25.7                              | 43.1              |
| 2000_1    | 20-Jun | 22-Jun | 3    | 24.8          | 25.5          | 4.5                              | 18.6                              | 42.9              |
| _2        | 14-Aug | 21-Aug | 8    | 22.7          | 24.7          | 8.3                              | 39.3                              | 45.7              |
| 2001_1    | 14-Aug | 19-Aug | 6    | 22.2          | 23.5          | 0.4                              | 18.6                              | 20.2              |
| 2002_1    | 18-Jun | 23-Jun | 6    | 23.2          | 24.9          | 9.4                              | 38.3                              | 67.3              |
| _2        | 8-Jul  | 10-Jul | 3    | 23.0          | 24.1          | 0.3                              | 8.7                               | 8.0               |
| _3        | 28-Jul | 31-Jul | 4    | 22.3          | 23.9          | 0.3                              | 11.9                              | 12.1              |
| 2003_1    | 10-Jun | 12-Jun | 3    | 23.2          | 24.3          | 3.6                              | 16.9                              | 21.1              |
| _2        | 19-Jul | 22-Jul | 4    | 22.8          | 25.0          | 3.1                              | 15.2                              | 20.0              |
| _3        | 1-Aug  | 10-Aug | 10   | 23.3          | 25.4          | 17.1                             | 30.7                              | 72.7              |
| _4        | 12-Aug | 14-Aug | 3    | 23.5          | 25.8          | 5.1                              | 4.4                               | 8.2               |
| 2004_1    | 17-Jul | 22-Jul | 6    | 22.1          | 23.3          | 2.2                              | 33.4                              | 27.1              |
| _2        | 10-Aug | 12-Aug | 3    | 22.6          | 24.1          | 0.7                              | 7.8                               | 4.9               |
| _3        | 17-Aug | 19-Aug | 3    | 22.8          | 23.5          | 0.7                              | 4.6                               | 5.6               |
| 2005_1    | 28-May | 30-May | 3    | 22.9          | 24.0          | 2.9                              | 29.7                              | 32.5              |
| _2        | 27-Jul | 30-Jul | 4    | 24.8          | 27.4          | 10.0                             | 24.2                              | 77.3              |
| 2006_1    | 19-Jun | 22-Jun | 4    | 22.7          | 23.8          | 3.3                              | 32.2                              | 34.4              |
| _2        | 24-Jun | 26-Jun | 3    | 22.9          | 23.7          | 1.0                              | 19.2                              | 12.7              |
| _3        | 10-Jul | 13-Jul | 4    | 23.1          | 24.7          | 6.2                              | 9.6                               | 15.9              |
| _4        | 18-Jul | 28-Jul | 11   | 24.1          | 25.5          | 26.5                             | 30.4                              | 99.7              |
| 2007_1    | 14-Jul | 21-Jul | 8    | 24.5          | 27.2          | 19.8                             | 48.5                              | 171.3             |
| 2008_1    | 26-Jul | 1-Aug  | 7    | 22.3          | 23.2          | 3.4                              | 26.0                              | 23.1              |
| 2009_1    | 14-Jul | 17-Jul | 4    | 22.2          | 23.4          | 0.6                              | 17.0                              | 8.9               |
| 2010_1    | 9-Jun  | 12-Jun | 4    | 23.1          | 24.2          | 5.8                              | 38.3                              | 59.9              |
| _2        | 29-Jun | 4-Jul  | 6    | 22.3          | 23.5          | 3.7                              | 29.4                              | 25.4              |
| _3        | 9-Jul  | 17-Jul | 9    | 24.5          | 26.3          | 24.1                             | 48.3                              | 163.7             |
| 2011_1    | 22-Aug | 26-Aug | 5    | 24.2          | 26.0          | 10.2                             | 28.6                              | 67.7              |
| 2012_1    | 18-Jun | 20-Jun | 3    | 22.8          | 24.4          | 4.1                              | 19.8                              | 27.3              |
| _2        | 29-Jun | 2-Jul  | 4    | 23.8          | 26.2          | 7.6                              | 24.0                              | 55.7              |
| _3        | 26-Jul | 28-Jul | 3    | 22.5          | 23.3          | 0.9                              | 8.3                               | 4.6               |
| _4        | 19-Aug | 22-Aug | 4    | 23.6          | 26.4          | 6.5                              | 17.1                              | 38.2              |
| 2013_1    | 17-Jun | 21-Jun | 5    | 24.6          | 26.5          | 13.5                             | 52.8                              | 158.7             |
| _2        | 26-Jul | 29-Jul | 4    | 25.4          | 28.5          | 13.2                             | 24.5                              | 90.0              |
| _3        | 1-Aug  | 8-Aug  | 8    | 24.1          | 26.7          | 17.7                             | 22.5                              | 65.2              |
| 2014_1    | 8-Jun  | 11-Jun | 4    | 24.1          | 24.9          | 6.7                              | 35.8                              | 74.4              |
| _2        | 18-Jul | 22-Jul | 5    | 23.0          | 25.6          | 8.7                              | 27.3                              | 50.7              |
| 2015_1    | 1-Jul  | 7-Jul  | 7    | 24.4          | 26.9          | 16.0                             | 46.3                              | 143.1             |
| _2        | 16-Jul | 25-Jul | 10   | 24.2          | 27.6          | 26.0                             | 48.2                              | 145.1             |
| _3        | 3-Aug  | 15-Aug | 13   | 26.0          | 28.3          | 57.6                             | 55.3                              | 292.4             |
| _4        | 27-Aug | 1-Sep  | 6    | 22.5          | 25.4          | 8.1                              | 4.9                               | 26.2              |

**Table S2A.** Impact of heat waves on mortality for the whole population, males and females, and the younger (0–64 yrs.) and the elderly (65+ yrs.) population groups, during 1994–2004 in the Czech Republic. The variables represent sum of excess deaths per standardized 10,000,000 inhabitants (excess mortality) and its 95% confidence intervals (CI), mean relative mortality deviation ( $\emptyset$ RMD), and cumulative relative mortality deviation ( $\Sigma$ RMD) during heat waves.

| Heat wave | Whole population        |                        |                     | Males                   |                        |                     | Females                 |                        |                     | 0–64 yrs.               |                        |                     | 65+ yrs.                |                        |                     |
|-----------|-------------------------|------------------------|---------------------|-------------------------|------------------------|---------------------|-------------------------|------------------------|---------------------|-------------------------|------------------------|---------------------|-------------------------|------------------------|---------------------|
|           | Excess mortality<br>(n) | $\emptyset$ RMD<br>(%) | $\Sigma$ RMD<br>(%) | Excess mortality<br>(n) | $\emptyset$ RMD<br>(%) | $\Sigma$ RMD<br>(%) | Excess mortality<br>(n) | $\emptyset$ RMD<br>(%) | $\Sigma$ RMD<br>(%) | Excess mortality<br>(n) | $\emptyset$ RMD<br>(%) | $\Sigma$ RMD<br>(%) | Excess mortality<br>(n) | $\emptyset$ RMD<br>(%) | $\Sigma$ RMD<br>(%) |
| 1994_1    | 552 (455;654)           | 26.8                   | 107.2               | 325 (249;405)           | 25.3                   | 101.3               | 229 (170;294)           | 29.4                   | 117.4               | 63 (17;115)             | 10.9                   | 43.7                | 487 (403;577)           | 32.7                   | 130.8               |
| _2        | 89 (12;170)             | 5.8                    | 17.3                | 70 (10;135)             | 7.4                    | 22.1                | 19 (-27;69)             | 3.2                    | 9.6                 | 53 (12;98)              | 12.3                   | 36.9                | 36 (-28;105)            | 3.3                    | 9.8                 |
| _3        | 144 (36;257)            | 4.8                    | 28.9                | 79 (-6;168)             | 4.3                    | 25.5                | 65 (-1;136)             | 5.7                    | 34.2                | 21 (-35;80)             | 2.4                    | 14.3                | 123 (32;220)            | 5.7                    | 34.1                |
| _4        | 1197 (1002;1397)        | 13.4                   | 240.3               | 664 (511;822)           | 11.8                   | 212.7               | 534 (414;658)           | 15.9                   | 285.6               | 352 (250;459)           | 14.1                   | 254.4               | 844 (678;1014)          | 13.0                   | 234.1               |
| 1995_1    | 512 (391;639)           | 14.7                   | 102.6               | 282 (187;381)           | 13.0                   | 91.0                | 230 (155;310)           | 17.3                   | 121.1               | 114 (52;181)            | 11.7                   | 82.2                | 397 (294;505)           | 15.8                   | 110.4               |
| _2        | 42 (-34;121)            | 2.8                    | 8.3                 | 38 (-21;102)            | 4.1                    | 12.3                | 4 (-42;53)              | 0.6                    | 1.7                 | -13 (-50;30)            | -3.0                   | -9.1                | 53 (-11;122)            | 4.9                    | 14.8                |
| 1996_1    | 171 (83;263)            | 8.9                    | 35.5                | 74 (6;146)              | 6.1                    | 24.4                | 99 (45;157)             | 13.7                   | 54.7                | 54 (8;104)              | 9.8                    | 39.2                | 117 (44;196)            | 8.5                    | 33.9                |
| 1998_1    | 231 (154;312)           | 16.7                   | 50.0                | 142 (82;207)            | 16.4                   | 49.1                | 87 (41;137)             | 16.7                   | 50.0                | 27 (-11;69)             | 7.0                    | 21.0                | 203 (137;274)           | 20.2                   | 60.6                |
| _2        | 373 (284;468)           | 20.2                   | 80.9                | 174 (106;248)           | 15.3                   | 61.0                | 200 (144;262)           | 28.6                   | 114.4               | 94 (48;145)             | 18.5                   | 73.9                | 283 (207;365)           | 21.2                   | 84.7                |
| 1999_1    | 357 (269;450)           | 20.0                   | 80.1                | 215 (146;288)           | 19.6                   | 78.2                | 143 (89;201)            | 20.9                   | 83.7                | 63 (20;112)             | 12.8                   | 51.1                | 294 (219;374)           | 22.9                   | 91.4                |
| 2000_1    | 150 (78;228)            | 11.4                   | 34.3                | 76 (20;137)             | 9.2                    | 27.7                | 76 (32;126)             | 15.2                   | 45.6                | 43 (6;84)               | 11.9                   | 35.8                | 108 (47;175)            | 11.2                   | 33.7                |
| _2        | 415 (296;540)           | 12.1                   | 96.4                | 200 (107;297)           | 9.3                    | 74.6                | 215 (141;294)           | 16.4                   | 131.4               | 102 (42;168)            | 10.9                   | 86.9                | 314 (213;421)           | 12.5                   | 100.0               |
| 2001_1    | 209 (107;316)           | 7.9                    | 47.6                | 90 (12;174)             | 5.6                    | 33.4                | 119 (55;187)            | 11.7                   | 70.1                | 107 (54;165)            | 15.2                   | 91.4                | 104 (18;195)            | 5.4                    | 32.2                |
| 2002_1    | 418 (313;527)           | 16.1                   | 96.6                | 279 (197;366)           | 17.4                   | 104.6               | 139 (76;208)            | 14.0                   | 83.9                | 102 (50;160)            | 14.6                   | 87.8                | 317 (227;411)           | 16.7                   | 100.1               |
| _2        | 44 (-26;118)            | 3.4                    | 10.3                | -8 (-60;50)             | -0.9                   | -2.7                | 51 (8;99)               | 10.3                   | 31.0                | 7 (-29;46)              | 1.9                    | 5.7                 | 38 (-21;102)            | 4.1                    | 12.3                |
| _3        | 128 (46;214)            | 7.5                    | 29.8                | 72 (8;140)              | 6.7                    | 26.8                | 57 (7;112)              | 8.6                    | 34.4                | 15 (-26;60)             | 3.2                    | 12.7                | 115 (45;190)            | 9.1                    | 36.4                |
| 2003_1    | 40 (-31;115)            | 3.0                    | 8.9                 | 3 (-51;62)              | 0.3                    | 1.0                 | 36 (-8;85)              | 7.1                    | 21.2                | 19 (-17;59)             | 5.4                    | 16.1                | 21 (-40;85)             | 2.0                    | 6.1                 |
| _2        | 265 (181;355)           | 15.5                   | 61.8                | 183 (116;254)           | 17.1                   | 68.2                | 81 (31;136)             | 12.5                   | 49.9                | 94 (51;142)             | 20.7                   | 82.9                | 171 (99;248)            | 13.5                   | 54.0                |
| _3        | 254 (124;388)           | 6.0                    | 59.7                | 146 (44;252)            | 5.5                    | 54.8                | 108 (30;192)            | 6.8                    | 67.8                | 47 (-18;116)            | 4.3                    | 42.9                | 203 (92;319)            | 6.5                    | 64.5                |
| _4        | 21 (-49;94)             | 1.6                    | 4.7                 | -11 (-64;48)            | -1.3                   | -4.0                | 31 (-12;78)             | 6.4                    | 19.2                | 12 (-23;51)             | 3.3                    | 10.0                | 10 (-49;74)             | 1.0                    | 3.1                 |
| 2004_1    | 217 (117;322)           | 8.7                    | 52.3                | 177 (98;261)            | 11.4                   | 68.4                | 41 (-19;105)            | 4.3                    | 25.7                | 56 (6;110)              | 8.3                    | 50.1                | 160 (75;250)            | 8.7                    | 52.5                |
| _2        | -14 (-80;57)            | -1.1                   | -3.4                | -22 (-73;35)            | -2.9                   | -8.6                | 11 (-30;56)             | 2.3                    | 6.9                 | -32 (-63;5)             | -9.8                   | -29.3               | 19 (-39;80)             | 2.0                    | 6.0                 |
| _3        | 112 (43;186)            | 9.2                    | 27.6                | 65 (11;124)             | 8.6                    | 25.7                | 47 (6;94)               | 10.2                   | 30.5                | 25 (-10;63)             | 7.5                    | 22.6                | 90 (31;154)             | 9.9                    | 29.8                |

**Table S2B** Impact of heat waves on mortality for the whole population, males and females, and the younger (0–64 yrs.) and the elderly (65+ yrs.) population groups, during 2005–2015 in the Czech Republic. The variables represent sum of excess deaths per standardized 10,000,000 inhabitants (excess mortality) and its 95% confidence intervals (CI), mean relative mortality deviation ( $\emptyset$ RMD), and cumulative relative mortality deviation ( $\Sigma$ RMD) during heat waves.

| Heat wave | Whole population        |                        |                     | Males                   |                        |                     | Females                 |                        |                     | 0–64 yrs.               |                        |                     | 65+ yrs.                |                        |                     |
|-----------|-------------------------|------------------------|---------------------|-------------------------|------------------------|---------------------|-------------------------|------------------------|---------------------|-------------------------|------------------------|---------------------|-------------------------|------------------------|---------------------|
|           | Excess mortality<br>(n) | $\emptyset$ RMD<br>(%) | $\Sigma$ RMD<br>(%) | Excess mortality<br>(n) | $\emptyset$ RMD<br>(%) | $\Sigma$ RMD<br>(%) | Excess mortality<br>(n) | $\emptyset$ RMD<br>(%) | $\Sigma$ RMD<br>(%) | Excess mortality<br>(n) | $\emptyset$ RMD<br>(%) | $\Sigma$ RMD<br>(%) | Excess mortality<br>(n) | $\emptyset$ RMD<br>(%) | $\Sigma$ RMD<br>(%) |
| 2005_1    | 85 (16;159)             | 7.0                    | 20.9                | 36 (-18;94)             | 4.7                    | 14.0                | 50 (8;97)               | 10.7                   | 32.2                | 28 (-7;67)              | 8.9                    | 26.7                | 60 (2;124)              | 6.6                    | 19.7                |
| _2        | 265 (182;353)           | 16.1                   | 64.5                | 175 (110;245)           | 17.3                   | 69.3                | 90 (40;146)             | 14.2                   | 56.9                | 10 (-30;54)             | 2.1                    | 8.6                 | 255 (182;332)           | 21.1                   | 84.4                |
| 2006_1    | 249 (168;336)           | 15.6                   | 62.4                | 174 (110;243)           | 17.6                   | 70.5                | 77 (28;130)             | 12.5                   | 49.8                | 60 (19;105)             | 14.1                   | 56.3                | 190 (120;265)           | 16.1                   | 64.5                |
| _2        | -11 (-76;60)            | -1.0                   | -3.0                | -5 (-56;51)             | -0.8                   | -2.5                | -7 (-46;38)             | -1.4                   | -4.3                | -27 (-57;9)             | -8.8                   | -26.3               | 15 (-42;75)             | 1.5                    | 4.6                 |
| _3        | 191 (111;276)           | 12.0                   | 48.1                | 136 (74;204)            | 14.1                   | 56.2                | 55 (7;108)              | 8.9                    | 35.6                | 57 (17;101)             | 13.8                   | 55.2                | 135 (66;208)            | 11.4                   | 45.7                |
| _4        | 369 (237;506)           | 8.5                    | 93.4                | 161 (59;267)            | 6.0                    | 66.4                | 213 (130;301)           | 12.6                   | 138.4               | 66 (2;136)              | 5.9                    | 65.3                | 308 (194;427)           | 9.5                    | 105.0               |
| 2007_1    | 628 (512;748)           | 20.9                   | 167.5               | 445 (354;542)           | 24.2                   | 193.4               | 182 (113;256)           | 15.7                   | 125.7               | 84 (28;144)             | 10.5                   | 84.3                | 544 (443;649)           | 24.6                   | 197.1               |
| 2008_1    | 296 (194;404)           | 11.6                   | 81.5                | 140 (61;224)            | 8.8                    | 61.9                | 159 (96;227)            | 16.4                   | 114.8               | 106 (53;163)            | 15.6                   | 109.5               | 192 (105;284)           | 10.2                   | 71.6                |
| 2009_1    | 28 (-46;107)            | 1.9                    | 7.6                 | 22 (-36;84)             | 2.4                    | 9.5                 | 7 (-38;56)              | 1.2                    | 4.6                 | -24 (-58;16)            | -6.2                   | -24.8               | 52 (-13;121)            | 4.7                    | 18.9                |
| 2010_1    | 211 (133;293)           | 14.4                   | 57.4                | 115 (54;180)            | 12.5                   | 49.9                | 96 (49;149)             | 17.4                   | 69.5                | 35 (-3;78)              | 9.2                    | 36.9                | 178 (110;250)           | 16.3                   | 65.1                |
| _2        | 101 (10;197)            | 4.6                    | 27.7                | 22 (-49;98)             | 1.6                    | 9.6                 | 80 (24;141)             | 9.9                    | 59.3                | 52 (6;103)              | 9.3                    | 55.5                | 51 (-28;133)            | 3.1                    | 18.5                |
| _3        | 471 (354;593)           | 14.4                   | 129.9               | 238 (147;335)           | 11.6                   | 104.1               | 234 (162;311)           | 19.4                   | 174.3               | 105 (47;168)            | 12.4                   | 111.9               | 366 (265;472)           | 15.1                   | 136.2               |
| 2011_1    | 207 (123;296)           | 11.8                   | 59.0                | 115 (49;186)            | 10.5                   | 52.3                | 92 (41;148)             | 14.0                   | 70.1                | 51 (10;97)              | 11.5                   | 57.3                | 157 (85;235)            | 12.0                   | 59.9                |
| 2012_1    | 45 (-18;113)            | 4.2                    | 12.7                | 25 (-25;78)             | 3.7                    | 11.2                | 20 (-18;63)             | 5.0                    | 14.9                | 13 (-18;48)             | 4.8                    | 14.3                | 34 (-21;92)             | 4.2                    | 12.5                |
| _2        | 143 (69;222)            | 10.5                   | 41.9                | 63 (6;125)              | 7.4                    | 29.7                | 80 (35;131)             | 15.4                   | 61.5                | 31 (-6;72)              | 9.0                    | 35.9                | 114 (50;183)            | 11.2                   | 44.7                |
| _3        | 128 (64;197)            | 12.5                   | 37.6                | 101 (50;156)            | 15.9                   | 47.8                | 27 (-12;69)             | 6.8                    | 20.3                | 20 (-11;56)             | 7.5                    | 22.4                | 108 (53;168)            | 14.2                   | 42.6                |
| _4        | 39 (-33;114)            | 2.7                    | 10.8                | 25 (-31;85)             | 2.7                    | 10.9                | 12 (-31;60)             | 2.3                    | 9.0                 | -38 (-71;-1)            | -10.8                  | -43.2               | 75 (13;142)             | 7.2                    | 28.9                |
| 2013_1    | 418 (330;511)           | 24.3                   | 121.7               | 214 (147;287)           | 20.2                   | 101.0               | 206 (151;266)           | 31.3                   | 156.6               | 96 (54;143)             | 23.0                   | 115.1               | 325 (248;407)           | 25.0                   | 125.0               |
| _2        | 259 (184;340)           | 19.5                   | 77.8                | 177 (118;242)           | 21.5                   | 85.9                | 82 (37;132)             | 16.0                   | 64.0                | 81 (43;123)             | 23.7                   | 94.7                | 176 (112;246)           | 17.7                   | 70.8                |
| _3        | 116 (15;222)            | 4.3                    | 34.6                | 13 (-65;95)             | 0.7                    | 5.7                 | 103 (40;171)            | 10.1                   | 81.0                | -25 (-73;29)            | -3.6                   | -29.0               | 139 (51;231)            | 7.0                    | 55.6                |
| 2014_1    | 196 (122;275)           | 14.8                   | 59.2                | 158 (99;222)            | 19.2                   | 76.6                | 39 (-5;87)              | 7.8                    | 31.0                | 45 (10;85)              | 13.5                   | 54.2                | 152 (88;220)            | 15.2                   | 61.0                |
| _2        | 161 (80;246)            | 9.9                    | 49.3                | 165 (100;234)           | 16.4                   | 82.0                | -4 (-50;48)             | -0.6                   | -3.2                | 36 (-3;80)              | 9.1                    | 45.5                | 123 (53;197)            | 10.0                   | 49.8                |
| 2015_1    | 304 (208;405)           | 13.6                   | 95.0                | 222 (146;303)           | 16.1                   | 112.6               | 82 (24;144)             | 9.5                    | 66.3                | 91 (43;144)             | 16.1                   | 112.9               | 217 (134;304)           | 12.9                   | 90.3                |
| _2        | 160 (49;276)            | 5.0                    | 50.3                | 60 (-26;151)            | 3.1                    | 30.7                | 102 (33;176)            | 8.4                    | 83.5                | 12 (-42;70)             | 1.6                    | 15.6                | 148 (52;249)            | 6.2                    | 61.7                |
| _3        | 847 (711;988)           | 20.4                   | 265.4               | 478 (373;589)           | 18.8                   | 245.0               | 371 (286;461)           | 23.1                   | 300.1               | 105 (42;174)            | 10.2                   | 132.2               | 750 (630;874)           | 24.1                   | 313.3               |
| _4        | 211 (117;311)           | 9.4                    | 65.8                | 114 (46;187)            | 9.6                    | 57.5                | 68 (11;131)             | 7.9                    | 55.0                | 55 (9;105)              | 9.7                    | 67.8                | 158 (76;245)            | 9.3                    | 65.2                |

**Table S3.** Sum of excess deaths per standardized 10,000,000 inhabitants during the extended heat wave periods (EHPs) during 1994–2015. Duration denotes the length of EHP. Displaced mortality represents the absolute value of the ratio of the sum of three-day-averaged mortality deviations during the negative phase of EHP (see section 2.5.3 in the main manuscript) to the sum of three-day-averaged mortality deviations during the positive phase. --- indicates that the heat wave was considered as a single EHP together with the following one.

| Heat wave | Duration (days) | Excess mortality (n) | Displaced mortality (%) |
|-----------|-----------------|----------------------|-------------------------|
| 1994_1    | ---             | ---                  | ---                     |
| _2        | 26              | 821 (589;1056)       | 18.4                    |
| _3        | 10              | 71 (-69;214)         | 28.3                    |
| _4        | 37              | 888 (617;1163)       | 26.6                    |
| 1995_1    | 20              | 749 (548;954)        | 2.4                     |
| _2        | 10              | -171 (-306;-33)      | 775.5                   |
| 1996_1    | 8               | 213 (89;341)         | 5.0                     |
| 1998_1    | 26              | 374 (155;596)        | 30.5                    |
| _2        | 16              | 231 (62;404)         | 43.9                    |
| 1999_1    | 19              | 622 (437;810)        | 6.3                     |
| 2000_1    | 11              | -46 (-180;92)        | 123.4                   |
| _2        | 25              | 312 (107;521)        | 36.5                    |
| 2001_1    | 13              | 88 (-60;240)         | 61.7                    |
| 2002_1    | 14              | 371 (216;530)        | 12.6                    |
| _2        | 12              | 185 (44;330)         | 1.4                     |
| _3        | 12              | 291 (148;438)        | 13.5                    |
| 2003_1    | 5               | 48 (-45;143)         | 21.8                    |
| _2        | 20              | 562 (377;752)        | 8.4                     |
| _3        | ---             | ---                  | ---                     |
| _4        | 17              | 156 (-12;328)        | 43.5                    |
| 2004_1    | 16              | 281 (120;447)        | 22.3                    |
| _2        | 15              | 34 (-119;189)        | 199.8                   |
| _3        | 5               | 23 (-65;114)         | 111.1                   |
| 2005_1    | 13              | 189 (44;337)         | 10.0                    |
| _2        | 8               | 274 (159;394)        | 5.8                     |
| 2006_1    | 16              | 562 (400;727)        | 2.4                     |
| _2        | 11              | -33 (-161;99)        | 200.9                   |
| _3        | 12              | 224 (88;364)         | 17.9                    |
| _4        | 30              | 296 (81;514)         | 36.7                    |
| 2007_1    | 29              | 441 (234;651)        | 38.4                    |
| 2008_1    | 13              | 285 (147;426)        | 18.9                    |
| 2009_1    | 8               | 51 (-55;161)         | 27.7                    |
| 2010_1    | 9               | 288 (172;408)        | 1.8                     |
| _2        | 9               | 103 (-10;219)        | 1.9                     |
| _3        | 14              | 414 (271;562)        | 5.2                     |
| 2011_1    | 18              | -12 (-166;146)       | 112.4                   |
| 2012_1    | 15              | 136 (-7;282)         | 29.8                    |
| _2        | 13              | 243 (110;380)        | 18.6                    |
| _3        | 16              | 355 (207;507)        | 3.1                     |
| _4        | 10              | 36 (-79;154)         | 29.6                    |
| 2013_1    | 18              | 299 (143;459)        | 37.3                    |
| _2        | ---             | ---                  | ---                     |
| _3        | 29              | 363 (168;561)        | 33.5                    |
| 2014_1    | 20              | 102 (-58;264)        | 69.1                    |
| _2        | 18              | 316 (163;472)        | 4.0                     |
| 2015_1    | 16              | 397 (253;545)        | 9.5                     |
| _2        | 15              | 120 (-17;259)        | 24.2                    |
| _3        | 23              | 681 (506;859)        | 22.4                    |
| _4        | 16              | 92 (-49;237)         | 54.9                    |
